# Supplementary material for: Activated signature of antiphospholipid syndrome neutrophils reveals potential therapeutic target
Source: JCI journal article supplement (doi:10.1172/jci.insight.93897), 2017-09-20
Supplement: sd1 [file 1]

## SUPPLEMENTARY MATERIAL

**Supplementary Table 1** Characteristics of the subjects included in this study

|                                  | <b>Primary APS</b> | <b>Controls</b> |
|----------------------------------|--------------------|-----------------|
| <b>N</b>                         | 40                 | 47              |
| <b>Female</b>                    | 24 (60%)           | 30 (64%)        |
| <b>Age (y)*</b>                  | 44 ± 5 (21-77)     | 42 ± 4 (22-67)  |
| <b>Disease duration (y)*</b>     | 9 ± 3 (1-28)       |                 |
| <b>White/Caucasian</b>           | 38 (95%)           | 42 (89%)        |
| <b>IgG anti-β<sub>2</sub>GPI</b> | 20/40 (50%)        |                 |
| <b>IgM anti-β<sub>2</sub>GPI</b> | 7/40 (18%)         |                 |
| <b>IgA anti-β<sub>2</sub>GPI</b> | 14/40 (35%)        |                 |
| <b>IgG anticardiolipin</b>       | 30/40 (75%)        |                 |
| <b>IgM anticardiolipin</b>       | 13/40 (33%)        |                 |
| <b>Lupus anticoagulant</b>       | 29/36 (81%)        |                 |
| <b>“Triple-positive”</b>         | 19/36 (53%)        |                 |
| <b>Venous thrombosis</b>         | 18/40 (45%)        |                 |
| <b>Arterial thrombosis</b>       | 16/40 (40%)        |                 |
| <b>Small vessel</b>              | 4/40 (10%)         |                 |
| <b>Pregnancy morbidity</b>       | 7/24 (29%)         |                 |
| <b>Thrombocytopenia</b>          | 9/40 (23%)         |                 |
| <b>Livedo</b>                    | 11/40 (28%)        |                 |
| <b>Warfarin</b>                  | 19/40 (48%)        |                 |
| <b>Aspirin</b>                   | 18/40 (45%)        |                 |
| <b>LMWH</b>                      | 2/40 (5%)          |                 |
| <b>Factor Xa inhibitor</b>       | 4/40 (10%)         |                 |
| <b>Hydroxychloroquine</b>        | 14/40 (35%)        |                 |
| <b>Immunosuppressant</b>         | 1/40 (3%)          |                 |

\* mean ± 95% confidence interval (range)

**Supplementary Table 2** Differentially expressed genes in neutrophils from patients with primary APS as compared with healthy matched controls

*(See separate attachment)*

**Supplementary Table 3** Gene ontology analysis of genes upregulated and downregulated in neutrophils from patients with primary APS as compared with healthy matched controls

*(See separate attachment)*

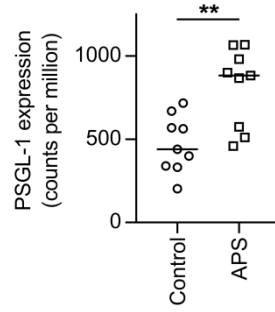

**Supplementary Figure 1** Details of PSGL-1 gene expression from the RNA sequencing data set, presented as counts per million. The mean for each group is denoted by a solid horizontal line, while each data point represents a unique control/patient; \*\* $P < 0.01$  by t test.

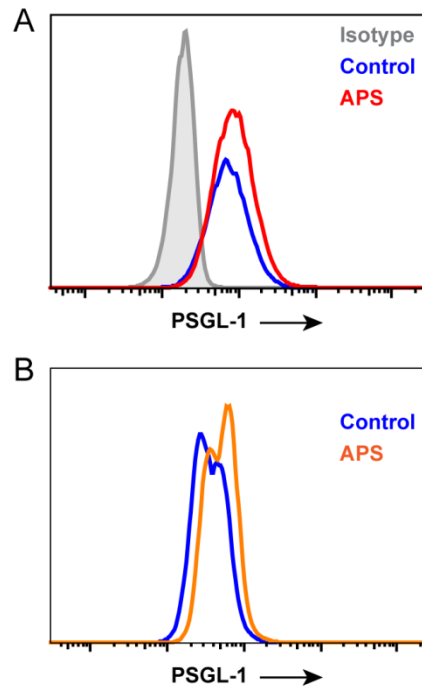

**Supplementary Figure 2** Conditioning control neutrophils with APS patient serum induces surface expression of PSGL-1. Control neutrophils were conditioned with either control or APS serum, as described in Methods. Neutrophils were then collected, and surface expression of PSGL-1 was quantified by flow cytometry. **A** and **B** demonstrate results for two different APS serum samples (red and orange, respectively). These data are representative of three independent experiments, all with similar results.

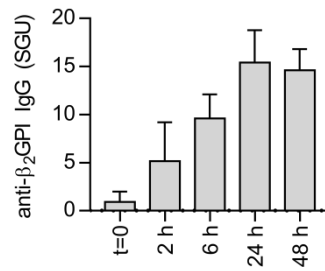

**Supplementary Figure 3** Human anti-β<sub>2</sub>GPI is detectable in the blood of mice following APS IgG injection. 2 mg of APS IgG was administered by intraperitoneal injection, and blood was collected for serum preparation at various time points after injection. SGU=standard IgG units, calculated according to manufacturer's instructions (Inova Diagnostics). Mean ± standard deviation are presented for n=3 mice per group.

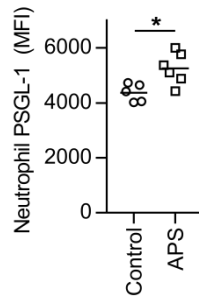

**Supplementary Figure 4** Increased surface expression of PSGL-1 *in vivo*, following administration of APS IgG. 2 mg of either control IgG or APS IgG was administered by intraperitoneal injection, and blood was collected 24 hours later for flow cytometry. MFI=mean fluorescence intensity. The mean for each group is denoted by a horizontal line, while each data point represents a unique mouse; \* $P < 0.05$  by t test.

**Supplementary Video 1** Leukocyte adhesion and rolling in WT mice treated with APS IgG.

The five-second video contains 150 frames. Leukocytes are stained red as described in Figure 5. Rolling leukocytes move along the vessel-wall surface at a rate that is slower than the background flow of blood.

*(See separate attachment)*



**Supplementary Video 2** Attenuated leukocyte adhesion and rolling in PSGL-1<sup>-/-</sup> mice treated with APS IgG. The five-second video contains 150 frames. Leukocytes are stained red as described in Figure 5. Rolling leukocytes move along the vessel-wall surface at a rate that is slower than the background flow of blood.

*(See attachment)*
